# Supplementary material
Source: Springer Nature journal article supplement (https://www.springermedizin.de/resource/supplementary/12885_2009_1900_MOESM1_ESM.pdf/9460054)

# PCR products of genomic DNA

Mutant

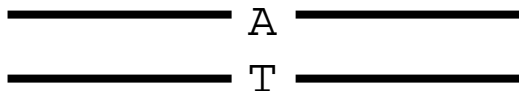

Wild Type

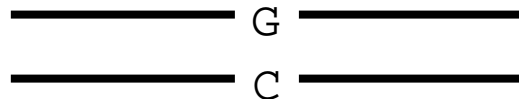

## SAP, Primer Extension and A,C,T,G terminators

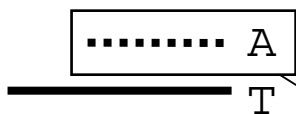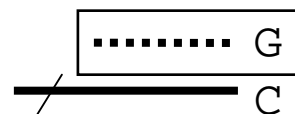

### Spectra from Maldi-Tof Separation

PIK3CA\_6

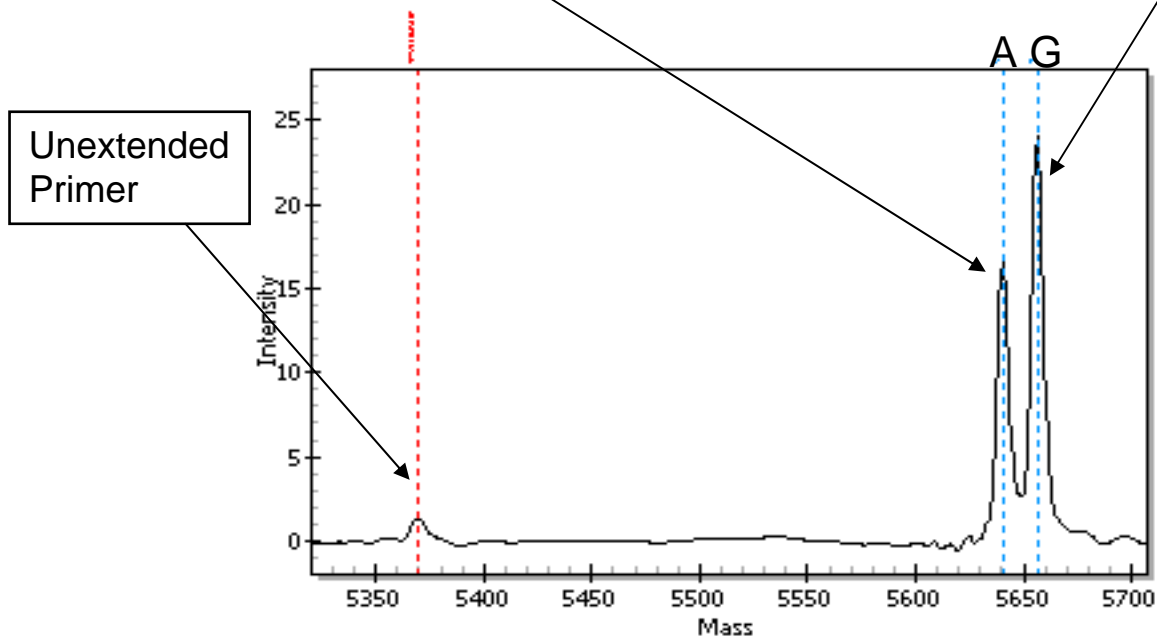

Supplement: MOESM1 [file 9460054]
